# Supplementary material for: Investigating the Processing Potential of Ethiopian Agricultural Residue Enset/Ensete ventricosum for Biobutanol Production
Source: MDPI journal article supplement (doi:10.3390/bioengineering9040133), 2022-03-24
Supplement: s1 [file s1]

Supplementary Materials

# Investigating the Processing Potential of Ethiopian Agricultural Residue Enset/*Ensete ventricosum* for Biobutanol Production

Nebyat Seid <sup>1</sup>, Pia Griesheimer <sup>2</sup>, and Anke Neumann <sup>1,\*</sup>

<sup>1</sup> Technical Biology, Institute of Process Engineering in Life Science 2, Karlsruhe Institute of Technology, 76131 Karlsruhe, Germany; nebyat.seid@kit.edu

<sup>2</sup> Institute of Catalysis Research and Technology, Karlsruhe Institute of Technology, 76344 Eggenstein-Leopoldshafen, Germany; pia.griesheimer@kit.edu

\* Correspondence: anke.neumann@kit.edu

**Table S1.** Monomeric sugars and degradation products in liquid hydrolysate Enset biomass parts after pretreated with different methods (a) alkali pretreatment (2% (w/v) NaOH); (b) acid pretreatment (2% (v/v) H<sub>2</sub>SO<sub>4</sub>).

| (a) alkali pretreatment (2% (w/v) NaOH)                          |                  |             |              |                   |
|------------------------------------------------------------------|------------------|-------------|--------------|-------------------|
| Analysis % (w/w)                                                 | Leaf sheath peel | Enset fiber | Midrib       | Mixed Enset waste |
| Cellobiose                                                       | 0.04 ± 0.01      | 0           | 0.03 ± 0.00  | 0.07 ± 0.00       |
| Glucose                                                          | 0.83 ± 0.04      | 0.36 ± 0.03 | 1.44 ± 0.12  | 0.37 ± 0.01       |
| Arabinose                                                        | 0                | 0           | 0.05 ± 0.00  | 0                 |
| Other sugar (xylose, mannose, and galactose)                     | 0.28 ± 0.02      | 0.17 ± 0.01 | 0.45 ± 0.06  | 0.28 ± 0.01       |
| Formic acid                                                      | 0.84 ± 0.16      | 0.59 ± 0.00 | 1.38 ± 0.04  | 1.03 ± 0.14       |
| Acetic acid                                                      | 5.41 ± 0.38      | 7.82 ± 0.01 | 11.01 ± 0.56 | 11.47 ± 0.50      |
| (b) acid pretreatment (2% (v/v) H <sub>2</sub> SO <sub>4</sub> ) |                  |             |              |                   |
| Analysis % (w/w)                                                 | Leaf sheath peel | Enset fiber | Midrib       | Mixed Enset waste |
| Cellobiose                                                       | 0.88 ± 0.77      | 2.09 ± 0.02 | 1.28 ± 0.02  | 1.32 ± 0.03       |
| Glucose                                                          | 10.46 ± 1.27     | 2.33 ± 0.13 | 4.71 ± 0.12  | 7.82 ± 0.20       |
| Arabinose                                                        | 1.07 ± 0.20      | 0.38 ± 0.03 | 3.66 ± 0.09  | 2.58 ± 0.05       |
| Other sugar (xylose, mannose, and galactose)                     | 7.37 ± 0.39      | 9.38 ± 0.04 | 9.33 ± 0.17  | 7.15 ± 0.12       |
| Formic acid                                                      | 0                | 0           | 0.38 ± 0.05  | 0.27 ± 0.02       |
| Acetic acid                                                      | 4.46 ± 0.54      | 5.95 ± 0.09 | 7.72 ± 0.87  | 8.25 ± 0.27       |
